# Supplementary material for: Genomic and TCR Repertoire Intratumor Heterogeneity of Small-cell Lung Cancer and its Impact on Survival
Source: Research Square preprint supplement (doi:10.21203/rs.3.rs-148314/v1), 2021-01-22
Supplement: Supplementary file 2 [file fee4a99d3b4eb151765aff98.xlsx]

## Sheet: data 1
Supplementary Data 1. Clinical characteristics and immunogenomic results for SCLCs (n=67; including the primary 19 patients) and NSCLCs (n=68)
New ID	Histology	Gender	Age	Smoking	Second-hand smoking	TNM Stage	Tumor size (cm)	Recurrence	DFS (months)	Vital status	OS (months)	TMB/Mb	CNA burden	Copy number JI	TCR JI
P01	SCLC	male	49	Yes	/	IIIA	3	No	147	Alive	147	9.26898	1585.33	0.2871	0.05567
P02	SCLC	female	62	No	43 years	IIIA	2.5	Yes	1	Deceased	23	2.69807	2479.67	0.51899	na
P03	SCLC	male	56	Yes	/	IIIA	2.6	No	45	Alive	45	2.30434	70.5	0.13559	na
P04	SCLC	male	61	Yes	/	IA	1.9	Yes	10	Deceased	32	2.76908	3893	0.8479	na
P05	SCLC	female	55	No	32 years	IIIA	4.5	Yes	1	Deceased	9	4.80231	2444	0.87366	0.03633
P06	SCLC	female	74	Yes	/	IIIA	3	Unknown	Unknown	Deceased	8	2.69807	5924.33	0.72867	0.051
P07	SCLC	male	70	Yes	/	IIIA	3.5	Yes	8	Deceased	16	9.13988	8044.33	0.90512	0.02233
P08	SCLC	male	61	Yes	/	IIIA	2.8	Yes	24	Deceased	47	5.04759	2112	0.92692	0.07133
P09	SCLC	male	65	Yes	/	IIB	4.8	No	79	Alive	79	8.79133	2271.33	0.16034	0.12533
P10	SCLC	male	56	Yes	/	IIIA	3.7	Unknown	Unknown	Deceased	19	4.94432	5784.33	0.92715	0.023
P11	SCLC	male	65	Yes	/	IA	2.5	No	76	Alive	76	15.6269	305	0.0177	na
P12	SCLC	female	54	No	20 years	IIIA	4.5	No	73	Alive	73	3.71792	2310	0.80225	0.01333
P13	SCLC	male	56	Yes	/	IA	1.5	No	69	Alive	69	8.2104	26	na	na
P14	SCLC	male	59	Yes	/	IA	2.7	Yes	14	Alive	68	7.95222	4318.33	0.60341	na
P15	SCLC	female	65	No	45 years	IA	2.5	Yes	16	Deceased	53	6.33208	1929.5	0.32471	0.146
P16	SCLC	male	56	Yes	/	IB	3.3	No	62	Alive	62	6.842	3355	0.48105	0.057
P17	SCLC	male	67	Yes	/	IA	1.5	No	17	Alive	17	32.2607	444	0.22426	na
P18	SCLC	male	60	Yes	/	IIA	1.7	No	63	Alive	63	5.89961	435.667	0.33966	na
P19	SCLC	male	61	Yes	/	IA	2.3	No	65	Alive	65	6.00289	4344	0.39834	na
P20	SCLC	male	65	Yes	/	IIA	2.5	No	6	Alive	6	na	na	na	na
P21	SCLC	male	70	Yes	/	IIIA	4	No	6	Alive	6	na	na	na	na
P22	SCLC	male	63	Yes	/	IA	2	No	9	Alive	9	na	na	na	na
P23	SCLC	male	75	Yes	/	IIA	2.2	No	11	Alive	11	na	na	na	na
P24	SCLC	female	54	No	30 years	IIB	5.2	No	13	Alive	13	na	na	na	na
P25	SCLC	male	66	Yes	/	IIA	1.8	Unknown	Unknown	Unknown	Unknown	na	na	na	na
P26	SCLC	male	54	Yes	/	IA	2.5	No	13	Alive	13	na	na	na	na
P27	SCLC	male	64	Yes	/	IIA	3	Yes	8	Deceased	11	na	na	na	na
P28	SCLC	male	82	Yes	/	IA	3	Unknown	Unknown	Deceased	10	na	na	na	na
P29	SCLC	male	74	Yes	/	IIA	1.7	No	16	Alive	16	na	na	na	na
P30	SCLC	male	59	Yes	/	IIA	3	Yes	9	Unknown	Unknown	na	na	na	na
P31	SCLC	male	57	Yes	/	IIA	1.5	No	18	Alive	18	na	na	na	na
P32	SCLC	female	68	No	Unknown	IIA	2.5	Unknown	Unknown	Deceased	9	na	na	na	na
P33	SCLC	male	70	Yes	/	IB	4	Yes	8	Deceased	16	na	na	na	na
P34	SCLC	male	67	Yes	/	IA	3	No	23	Alive	23	na	na	na	na
P35	SCLC	male	74	Yes	/	IIB	2	Yes	7	Deceased	13	na	na	na	na
P36	SCLC	male	66	Yes	/	IIA	1	No	28	Alive	28	na	na	na	na
P37	SCLC	male	55	Yes	/	IIB	4	Yes	29	Alive	30	na	na	na	na
P38	SCLC	male	74	No	Unknown	IA	2.8	Unknown	Unknown	Unknown	Unknown	na	na	na	na
P39	SCLC	male	51	Yes	/	IA	1.2	No	37	Alive	37	na	na	na	na
P40	SCLC	female	58	No	10 years	IIB	3	Yes	7	Alive	24	na	na	na	na
P41	SCLC	female	57	No	No	IA	1.6	No	35	Alive	35	na	na	na	na
P42	SCLC	male	68	Yes	/	IB	1.8	Yes	6	Deceased	26	na	na	na	na
P43	SCLC	male	65	Yes	/	IIA	2.5	Yes	12	Deceased	30	na	na	na	na
P44	SCLC	male	69	Yes	/	IIB	5	Unknown	Unknown	Deceased	10	na	na	na	na
P45	SCLC	male	55	Yes	/	IIA	1	No	37	Alive	37	na	na	na	na
P46	SCLC	male	71	No	Unknown	IIIA	2.4	Unknown	Unknown	Unknown	Unknown	na	na	na	na
P47	SCLC	male	72	Yes	/	IB	3.5	No	40	Alive	40	na	na	na	na
P48	SCLC	male	63	Yes	/	IIA	3	No	41	Alive	41	na	na	na	na
P49	SCLC	female	71	No	Unknown	IIIA	10	Yes	3	Deceased	12	na	na	na	na
P50	SCLC	male	72	No	10 years	IA	2.5	No	43	Alive	43	na	na	na	na
P51	SCLC	male	76	Yes	/	IA	3	Unknown	Unknown	Unknown	Unknown	na	na	na	na
P52	SCLC	male	68	Yes	/	IA	5	Yes	15	Deceased	21	na	na	na	na
P53	SCLC	male	70	No	Unknown	IA	1.5	Yes	12	Unknown	Unknown	na	na	na	na
P54	SCLC	male	58	Yes	/	IA	1.7	Yes	13	Alive	49	na	na	na	na
P55	SCLC	male	76	Yes	/	IIB	3	No	20	Alive	20	na	na	na	na
P56	SCLC	male	71	Yes	/	IIB	7.5	No	28	Alive	28	na	na	na	na
P57	SCLC	male	44	Yes	/	IA	2.2	Yes	5	Alive	51	na	na	na	na
P58	SCLC	male	50	Yes	/	IIB	4	No	56	Alive	56	na	na	na	na
P59	SCLC	male	38	Yes	/	IB	4	No	56	Alive	56	na	na	na	na
P60	SCLC	male	62	Yes	/	IB	3.2	Yes	14	Alive	56	na	na	na	na
P61	SCLC	male	64	Yes	/	IB	4	Yes	8	Alive	17	na	na	na	na
P62	SCLC	male	72	Yes	/	IA	3	Yes	7	Alive	16	na	na	na	na
P63	SCLC	female	48	No	10 years	IIB	3	No	61	Alive	61	na	na	na	na
P64	SCLC	male	65	No	Unknown	IIIA	4.5	Unknown	Unknown	Deceased	11	na	na	na	na
P65	SCLC	male	62	Yes	/	IA	3	No	98	Alive	98	na	na	na	na
P66	SCLC	male	54	Yes	/	IIIA	1.4	No	31	Alive	31	na	na	na	na
P67	SCLC	male	54	Yes	/	IA	2.5	Unknown	Unknown	Deceased	62	na	na	na	na
PN01	NSCLC	female	72	No	No	IA	2	No	3	Alive	3	na	na	na	na
PN02	NSCLC	female	53	No	No	IA	3	No	3	Alive	3	na	na	na	na
PN03	NSCLC	male	56	Yes	/	IB	3.6	No	4	Alive	4	na	na	na	na
PN04	NSCLC	female	69	No	No	IIIA	3.5	No	4	Alive	4	na	na	na	na
PN05	NSCLC	male	73	No	No	IA	2.5	No	4	Alive	4	na	na	na	na
PN06	NSCLC	female	55	No	No	IIIA	2.5	No	4	Alive	4	na	na	na	na
PN07	NSCLC	female	43	No	No	IA	2.5	No	4	Alive	4	na	na	na	na
PN08	NSCLC	male	60	Yes	/	IIIA	1.9	No	4	Alive	4	na	na	na	na
PN09	NSCLC	female	64	No	Yes	IB	2.5	No	4	Alive	4	na	na	na	na
PN10	NSCLC	male	64	Yes	/	IIIA	7	No	4	Alive	4	na	na	na	na
PN11	NSCLC	male	57	Yes	/	IA	2.5	No	4	Alive	4	na	na	na	na
PN12	NSCLC	male	72	Yes	/	IA	1.5	No	5	Alive	5	na	na	na	na
PN13	NSCLC	female	73	No	20 years	IIA	3	No	5	Alive	5	na	na	na	na
PN14	NSCLC	female	60	No	10 years	IIB	4	No	5	Alive	5	na	na	na	na
PN15	NSCLC	female	62	No	30 years	IA	3	No	5	Alive	5	na	na	na	na
PN16	NSCLC	male	55	Yes	/	IB	3.7	No	5	Alive	5	na	na	na	na
PN17	NSCLC	male	66	Yes	/	IIIA	8.5	No	17	Alive	17	na	na	na	na
PN18	NSCLC	female	79	Yes	/	IB	3	No	5	Alive	5	na	na	na	na
PN19	NSCLC	male	70	Yes	/	IB	2.2	No	5	Alive	5	na	na	na	na
PN20	NSCLC	male	65	No	No	IA	2.3	No	5	Alive	5	na	na	na	na
PN21	NSCLC	female	57	Yes	/	IIA	4.5	No	5	Alive	5	na	na	na	na
PN22	NSCLC	female	71	No	No	IIIA	3	No	5	Alive	5	na	na	na	na
PN23	NSCLC	male	63	No	20 years	IA	1.5	No	6	Alive	6	na	na	na	na
PN24	NSCLC	male	53	Yes	/	IB	2.2	No	6	Alive	6	na	na	na	na
PN25	NSCLC	male	69	Yes	/	IA	2.5	No	6	Alive	6	na	na	na	na
PN26	NSCLC	male	57	Yes	/	IB	3.1	No	6	Alive	6	na	na	na	na
PN27	NSCLC	female	59	No	No	IB	1.9	No	6	Alive	6	na	na	na	na
PN28	NSCLC	female	55	No	20 years	IIA	2	No	6	Alive	6	na	na	na	na
PN29	NSCLC	male	69	Yes	/	IA	1.1	No	6	Alive	6	na	na	na	na
PN30	NSCLC	female	59	No	40 years	IIIA	2.3	No	7	Alive	7	na	na	na	na
PN31	NSCLC	male	53	Yes	/	IIIA	4.8	No	7	Alive	7	na	na	na	na
PN32	NSCLC	female	48	No	10 years	IIIA	2.5	No	7	Alive	7	na	na	na	na
PN33	NSCLC	male	72	Yes	/	IA	3	No	7	Alive	7	na	na	na	na
PN34	NSCLC	male	59	Yes	/	IA	2	No	7	Alive	7	na	na	na	na
PN35	NSCLC	female	54	No	No	IIA	2.5	No	7	Alive	7	na	na	na	na
PN36	NSCLC	male	50	No	10 years	IIIA	3.5	No	8	Alive	8	na	na	na	na
PN37	NSCLC	male	68	Yes	/	IA	2	No	8	Alive	8	na	na	na	na
PN38	NSCLC	male	66	No	20 years	IIIA	2.2	No	8	Alive	8	na	na	na	na
PN39	NSCLC	male	74	Yes	/	IA	3	No	9	Alive	9	na	na	na	na
PN40	NSCLC	male	62	Yes	/	IIIA	2.7	No	9	Alive	9	na	na	na	na
PN41	NSCLC	male	43	Yes	/	IA	3	No	9	Alive	9	na	na	na	na
PN42	NSCLC	male	70	Yes	/	IA	2.5	No	9	Alive	9	na	na	na	na
PN43	NSCLC	male	57	Yes	/	IIA	3	No	10	Alive	10	na	na	na	na
PN44	NSCLC	male	64	Yes	/	IA	2.8	No	10	Alive	10	na	na	na	na
PN45	NSCLC	female	36	No	10 years	IIIA	2	No	12	Alive	12	na	na	na	na
PN46	NSCLC	male	55	Yes	/	IA	2	No	13	Alive	13	na	na	na	na
PN47	NSCLC	male	73	Yes	/	IIB	4	No	13	Alive	13	na	na	na	na
PN48	NSCLC	male	64	Yes	/	IA	1	No	12	Alive	12	na	na	na	na
PN49	NSCLC	male	50	Yes	/	IA	3	No	13	Alive	13	na	na	na	na
PN50	NSCLC	male	67	Yes	/	IA	2.2	No	14	Alive	14	na	na	na	na
PN51	NSCLC	male	70	Yes	/	IIA	3.5	No	14	Alive	14	na	na	na	na
PN52	NSCLC	male	74	Yes	/	IA	3	No	14	Alive	14	na	na	na	na
PN53	NSCLC	male	54	Yes	/	IIB	4	No	14	Alive	14	na	na	na	na
PN54	NSCLC	male	56	Yes	/	IIIA	4.5	No	16	Alive	16	na	na	na	na
PN55	NSCLC	male	65	Yes	/	IIIA	5	No	25	Alive	25	na	na	na	na
PN56	NSCLC	male	77	Yes	/	IIIA	3.5	No	26	Alive	26	na	na	na	na
PN57	NSCLC	male	67	Yes	/	IIIA	4.5	No	30	Alive	30	na	na	na	na
PN58	NSCLC	male	56	No	No	IIIA	2	No	35	Alive	35	na	na	na	na
PN59	NSCLC	male	64	Yes	/	IIIA	4.5	No	36	Alive	36	na	na	na	na
PN60	NSCLC	male	65	Yes	/	IIA	3	Yes	10	Deceased	12	na	na	na	na
PN61	NSCLC	male	78	Yes	/	IIA	2.2	No	38	Alive	38	na	na	na	na
PN62	NSCLC	male	67	Yes	/	IIIA	5	No	39	Alive	39	na	na	na	na
PN63	NSCLC	male	59	Yes	/	IIIA	4	No	40	Alive	40	na	na	na	na
PN64	NSCLC	male	70	Yes	/	IIIA	4.5	Yes	22	Unkown	Unknown	na	na	na	na
PN65	NSCLC	male	63	No	Unkown	IIIA	2.4	Yes	25	Unkown	Unknown	na	na	na	na
PN66	NSCLC	male	71	Yes	/	IIA	3	No	43	Alive	43	na	na	na	na
PN67	NSCLC	male	66	Yes	/	IIIA	5	Yes	13	Deceased	31	na	na	na	na
PN68	NSCLC	male	76	Yes	/	IIA	2	No	45	Alive	45	na	na	na	na
DFS: disease free survival
OS: overall survival
P: patients of small-cell lung cancer
PN: patients of non-small cell lung cancer
